# Supplementary material
Source: PubMed Central journal article supplement (PMC5067820)
Supplement: 10.1164_rccm.201512-2518OC_yi_data_supplement.pdf [file 10.1164_rccm.201512-2518OC_yi_data_supplement.pdf]

**Abnormal Glucose Tolerance in Infants and Young Children with Cystic Fibrosis**

Yaling Yi MS, Andrew W. Norris PhD, Kai Wang PhD, Xingshen Sun PhD, Aliye Uc MD ,  
Antoinette Moran MD, John F. Engelhardt PhD, Katie Larson Ode MD

ONLINE DATA SUPPLEMENT

**Supplemental methods:**

The antibody pairs in the panel were specific only to the desired analyte and exhibited no or negligible (<2%) cross-reactivity with other analytes in the panel. The minimal detectable concentration for the insulin assay was 14.9 pmol/L and C-peptide the minimal detectable concentration was 0.33pmol/L. Coefficient of variation for the insulin assay was 1.4%; C-peptide, 2.7%; and glucose, 1.5%.

**Supplemental table:**

**Supplemental Table: Genotype, glucose tolerance status and pancreatic status for subjects with cystic fibrosis**

| Subject number | Mutation1/Mutation 2      | glucose tolerance category* | fecal elastase** (µg/g) | status of exocrine pancreas† |
|----------------|---------------------------|-----------------------------|-------------------------|------------------------------|
| 1              | delta F508/G542X          | NGT                         | <6                      | insufficient                 |
| 2              | Delta F 508/ 621+1G>T     | NGT                         | <6                      | insufficient                 |
| 3              | delta F508/G551D          | NGT                         | 29                      | insufficient                 |
| 4              | delta F508/c.1807delG     | could not be classified     | 21                      | insufficient                 |
| 5              | delta F508/G551D          | IGT                         | 89                      | insufficient                 |
| 6              | delta F508/G551D          | NGT                         | 53                      | insufficient                 |
| 7              | deltaF508/G542X no 5T     | NGT                         | <6                      | insufficient                 |
| 8              | delta F508/delta F508     | NGT                         | 93                      | insufficient                 |
| 9              | delta F508/G542X†††       | NGT                         | 20                      | insufficient                 |
| 10             | delta F508/delta F508     | NGT                         | NR                      | insufficient                 |
| 11             | delta F508/Q1313X         | IGT                         | <15                     | insufficient                 |
| 12             | deltaF508/394delTT        | IGT                         | NR                      | sufficient                   |
| 13             | delta F508/delta F508     | NGT                         | NR                      | insufficient                 |
| 14             | delta F508/delta F508     | NGT                         | 98                      | insufficient                 |
| 15             | delta F508/delta F508     | IGT                         | NR                      | insufficient                 |
| 16             | delta F508/delta F508     | INDET                       | <50                     | insufficient                 |
| 17             | deltaF508/3120G>A         | IGT                         | 222                     | insufficient                 |
| 18             | delta F508/delta F508     | DM                          | NR                      | insufficient                 |
| 19             | deltaF508/3120G>A         | IGT                         | 222                     | insufficient                 |
| 20             | delta F508/delta F508     | IGT                         | NR                      | insufficient                 |
| 21             | delta F508/delta F508     | NGT                         | 57                      | insufficient                 |
| 22             | delta F508/ R553X         | DM                          | 21                      | insufficient                 |
| 23             | delta F508/delta F508     | NGT                         | NR                      | insufficient                 |
| 24             | G551D / 621+1 G>T         | NGT                         | NR                      | insufficient                 |
| 34             | delta F508/1154insTC      | could not be classified     | 27                      | insufficient                 |
| 35             | delta F508/3849+10kbC>T†† | could not be classified     | 7                       | insufficient                 |
| 36             | delta F508/delta F508***  | could not be classified     | 17                      | insufficient                 |

\*NGT=normal glucose tolerance, IGT = impaired glucose tolerance, INDET= indeterminate glycemia, DM= diabetes mellitus. Please see text for definitions of these categories of abnormal glucose tolerance. Subjects listed as “could not be classified” did not have available data for all points and could not have official glucose tolerance status determined. The last three subjects had iv failure and had essentially no samples available. Fecal elastase results were abstracted from the clinical record and were performed at variable ages. \*\*NR=not recorded in medical record. †Clinical pancreatic insufficiency or sufficiency was based on the classification recorded in the medical record by the child’s treating physician.††This subject’s genotype is typically associated with pancreatic sufficiency, but per the medical record the subject was classified as pancreatic insufficient. †††This subject has history of duodenal atresia s/p repair. \*\*\*This subject had history of meconium ileus.
